# Supplementary material for: Comparison of the Biological Behavior and Topographical Surface Assessment of a Minimally Invasive Dental Implant and a Standard Implant: An In Vitro Study
Source: MDPI journal article supplement (doi:10.3390/ma15217540), 2022-10-27
Supplement: s1 [file s1]

*Supplementary Material*

# **Comparison of the Biological Behavior and Topographical Surface Assessment of a Minimally Invasive Dental Implant and a Standard Implant: An In Vitro Study**

**Nina Attik <sup>1,2,\*</sup>, Marina Phantarasmy <sup>2</sup>, Hazem Abouelleil <sup>1,2</sup>, Charlène Chevalier <sup>1</sup>, Aurore Barraco <sup>1,3</sup>, Brigitte Grosgeat <sup>1,2,3</sup> and Arnaud Lafon <sup>1,2,3</sup>**

<sup>1</sup> Laboratoire des Multimatériaux et Interfaces, UMR CNRS 5615, Université Claude Bernard Lyon 1, 69622 Villeurbanne, France

<sup>2</sup> Faculté d'Odontologie, Université Claude Bernard Lyon 1, 69372 Lyon, France

<sup>3</sup> Hospices Civils de Lyon, Service d'Odontologie, 69003 Lyon, France

\* Correspondence: [nina.attik@univ-lyon1.fr](mailto:nina.attik@univ-lyon1.fr)

## Table of contents:

**Figure S1.** Design and threads morphology of NB<sup>TM</sup> (left) and MC<sup>®</sup> (right) by a digital microscope. **3**

**Figure S2.** Morphology of the chemical composition surface (mapping images by EDX). (a) NB<sup>TM</sup> (b) MC<sup>®</sup>. Scale bars = 1000  $\mu\text{m}$ . **3**

**Figure S3.** Representative images of cell morphology by epifluorescence microscopy at day 3 of exposure to implant extracts: hGF in indirect contact with (a) NB<sup>TM</sup> and (b) MC<sup>®</sup>. MG63 in indirect contact with (c) NB<sup>TM</sup> (d) MC<sup>®</sup>. Nucleus-blue (DAPI) and cytoskeleton-green (ALEXA Fluor<sup>TM</sup> 488 Phalloidin), scale bars = 50 $\mu\text{m}$ . **4**

**Figure S4.** Representative images of Alizarin Red S staining of cells mineralized nodules. (a) hGF cells were contacted with NB<sup>TM</sup> and (b) with MC<sup>®</sup> ; (c) MG63 contacted with NB<sup>TM</sup> and (d) with MC<sup>®</sup> respectively. Scale bars = 200 $\mu\text{m}$ . **5**

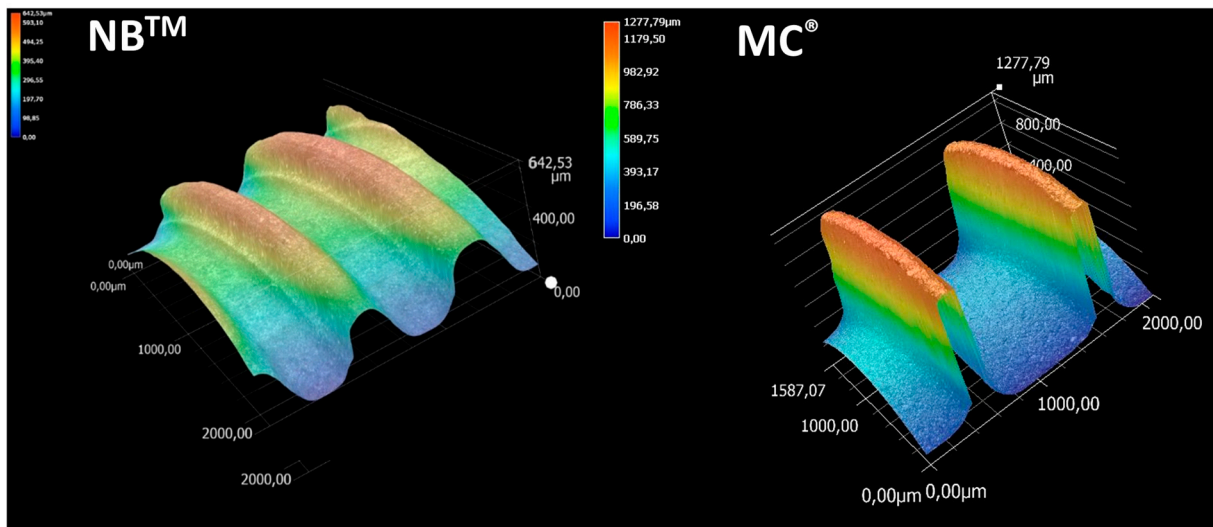

**Figure S1.** Design and threads morphology of NB™ (left) and MC® (right) by a digital microscope.

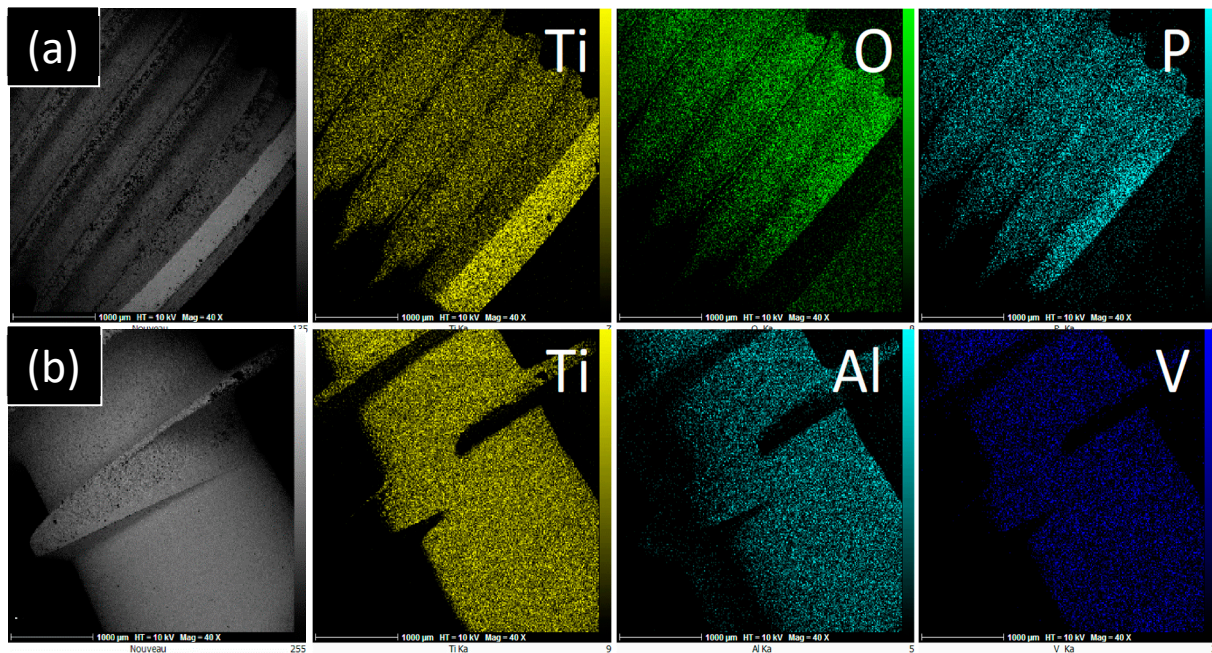

**Figure S2.** Morphology of the chemical composition surface (mapping images by EDX). (a) NB™ (b) MC®. Scale bars = 1000 μm.

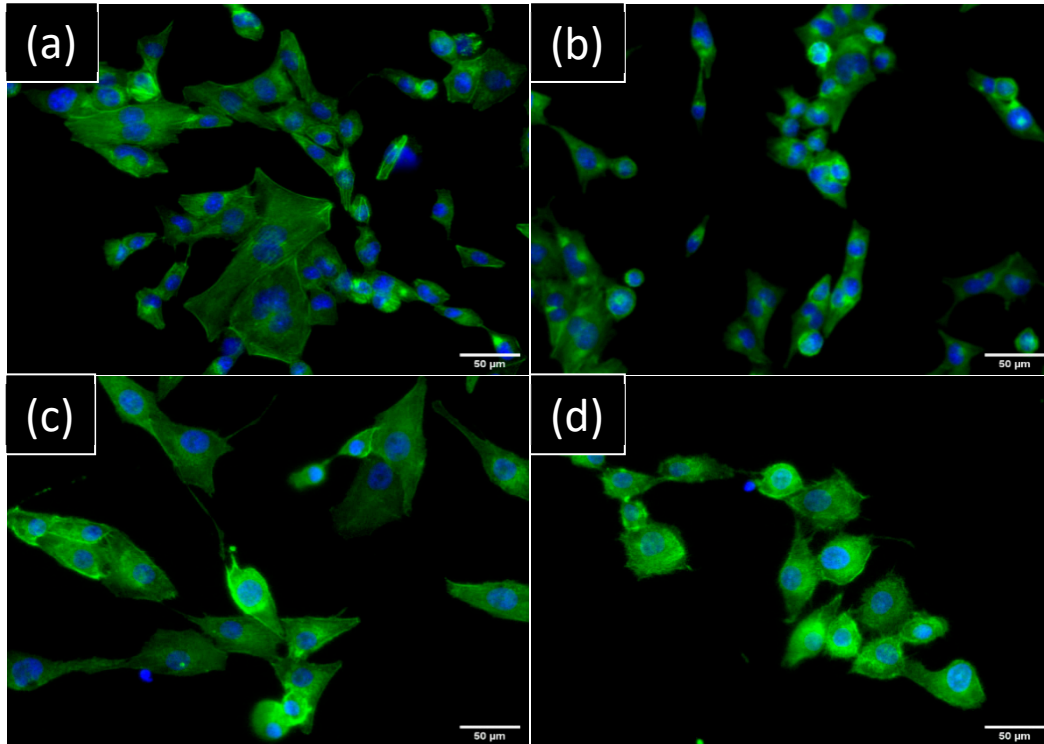

**Figure S3.** Representative images of cell morphology by epifluorescence microscopy at day 3 of exposure to implant extracts: hGF in indirect contact with (a) NB™ and (b) MC®. MG63 in indirect contact with (c) NB™ (d) MC®. Nucleus-blue (DAPI) and cytoskeleton-green (ALEXA FluorTM 488 Phalloidin), scale bars = 50μm.

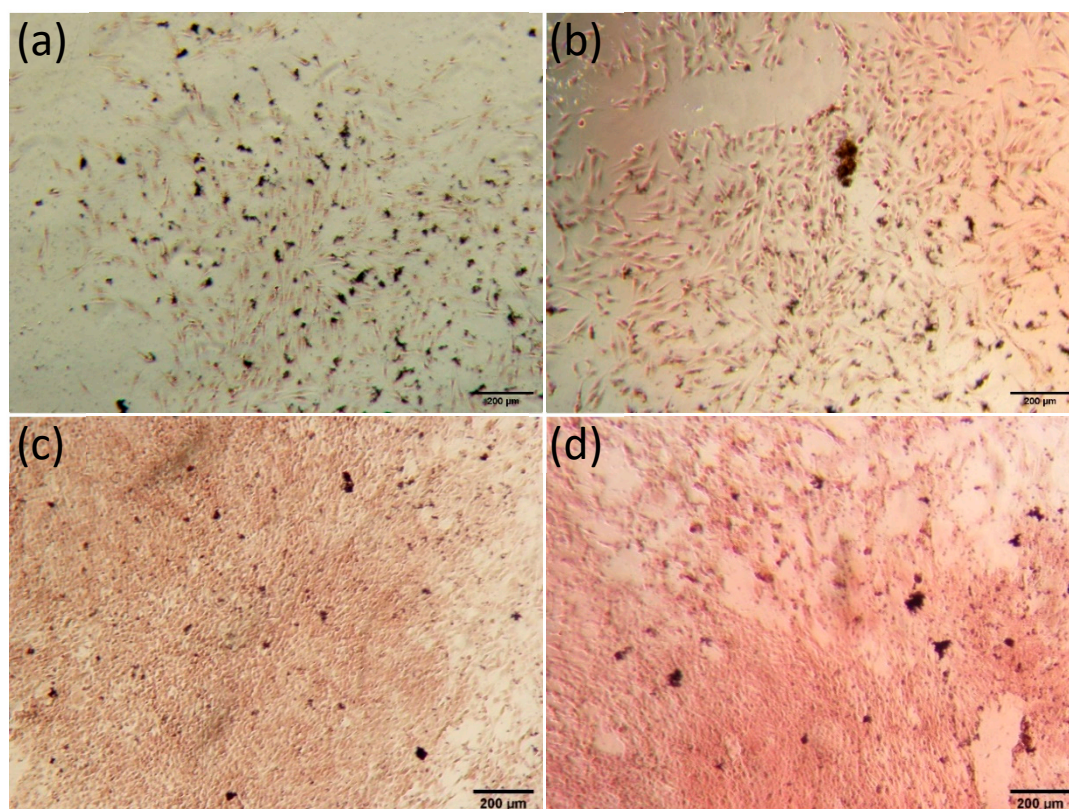

**Figure S4.** Representative images of Alizarin Red S staining of cells mineralized nodules. (a) hGF cells were contacted with NB™ and (b) with MC® ; (c) MG63 contacted with NB™ and (d) with MC® respectively. Scale bars = 200μm.
